# Supplementary material
Source: MDPI journal article supplement (https://www.mdpi.com/2254-9625/13/4/52)

**Table S1.** Entry level indicators.

| Low Level                                                                                                                                                                                         | Intermediate Level                                                                                                                                                                                                                                                                                                                                                    | High Level                                                                                                                                                                                                                                                                                            |
|---------------------------------------------------------------------------------------------------------------------------------------------------------------------------------------------------|-----------------------------------------------------------------------------------------------------------------------------------------------------------------------------------------------------------------------------------------------------------------------------------------------------------------------------------------------------------------------|-------------------------------------------------------------------------------------------------------------------------------------------------------------------------------------------------------------------------------------------------------------------------------------------------------|
| The student has difficulty keeping the steering wheel in play (in the air).<br>The student is not able to change grip.<br>The student shows difficulty in lifting the shuttlecock off the ground. | The student is able to keep the shuttlecock in the game even if it occasionally falls to the ground.<br>The student is able to change grip in some cases.<br>The student is able to lift the shuttlecock off the ground with the racquet even if he/she does not maintain control of the shuttlecock when doing so and eventually drops it to the ground on occasion. | The student is able to keep the shuttlecock in the air both when playing individually and when playing with a partner.<br>The student is able to change grip depending on whether he/she has to hit forehand or backhand.<br>The student is able to lift the shuttle off the ground with the racquet. |

**Figure S1.** Percentage of students corresponding to each level group.

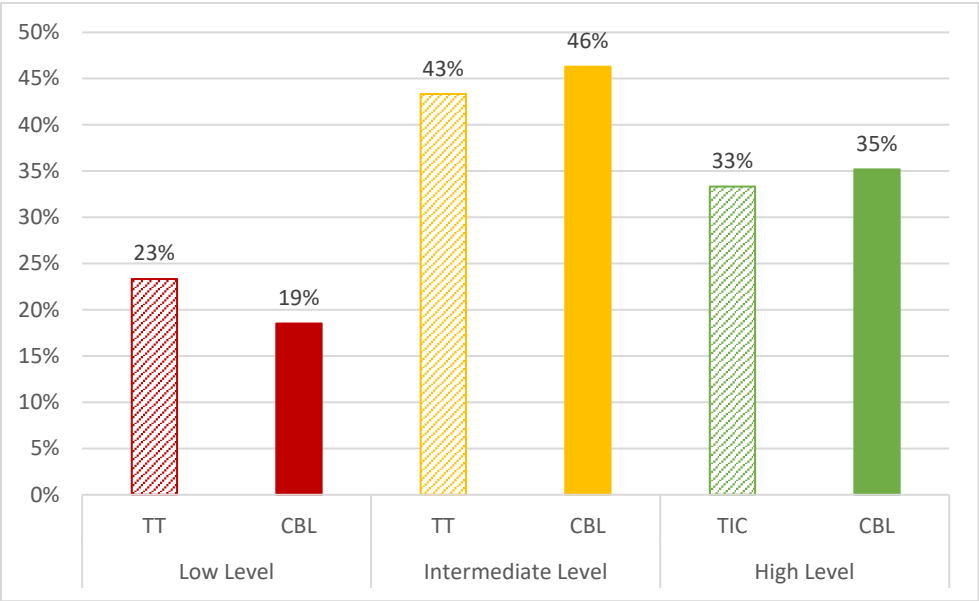

Supplement: s1 [file s1]
